# Supplementary material for: Ubiquitin-specific protease 12 interacting partners Uaf-1 and WDR20 are potential therapeutic targets in prostate cancer
Source: PubMed Central journal article supplement (PMC4741960; doi:10.18632/oncotarget.6075), 2015-10-10
Supplement: oncotarget-06-37724-s001.pdf [file oncotarget-06-37724-s001.pdf]

# Ubiquitin-specific protease 12 interacting partners Uaf-1 and WDR20 are potential therapeutic targets in prostate cancer

## Supplementary Material

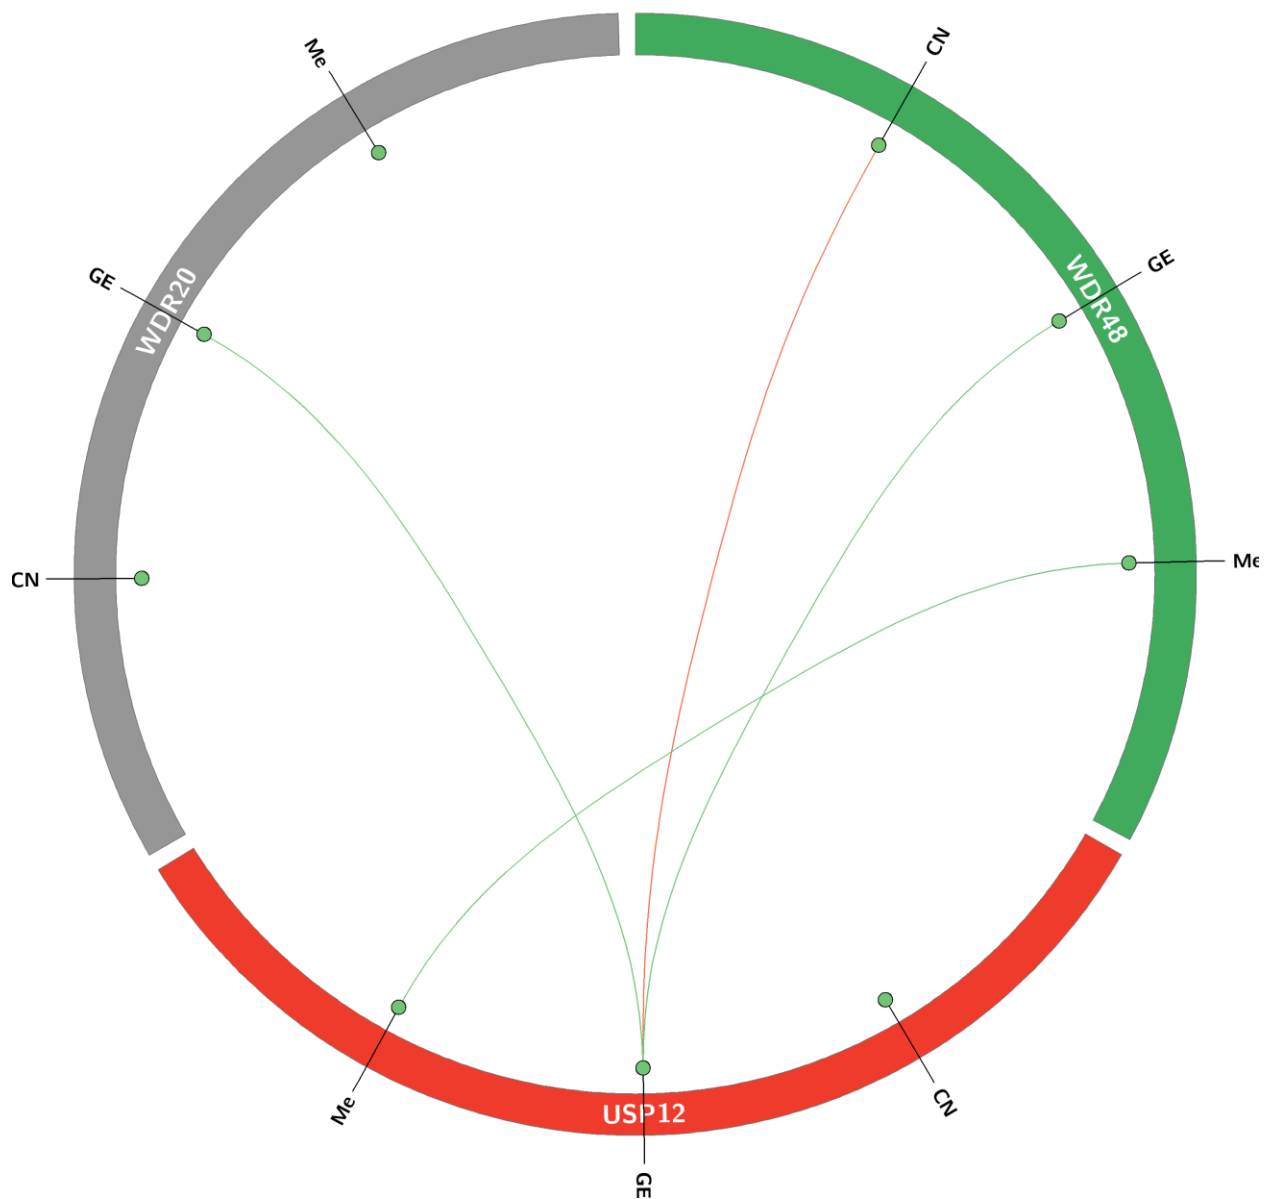

**Supplementary figure 1.**

ZODIAC analysis of the TCGA dataset for correlation between Usp12, Uaf-1 (WDR48) and WDR20 gene expression (GE), copy number (CN) and methylation (Me) levels. Positive correlations are marked in green and negative correlations in red.
